# Supplementary material
Source: publisher figshare collection journal article supplement (https://tandf.figshare.com/ndownloader/files/14135129)

Online supplementary material

**Home ranges and movements of Egyptian Vultures *Neophron percnopterus* in relation to rubbish dumps in Oman and the Horn of Africa**

M. J. McGrady1, D. L. Karelus2#, H. A. Rayaleh3, M. Sarrouf Willson4, B. –U. Meyburg5, M. K. Oli2, K. Bildstein6

**Figure S1.** Plots showing the average number of revisits to locations and dumpsites as the radius of the area to be counted as a revisit is increased.


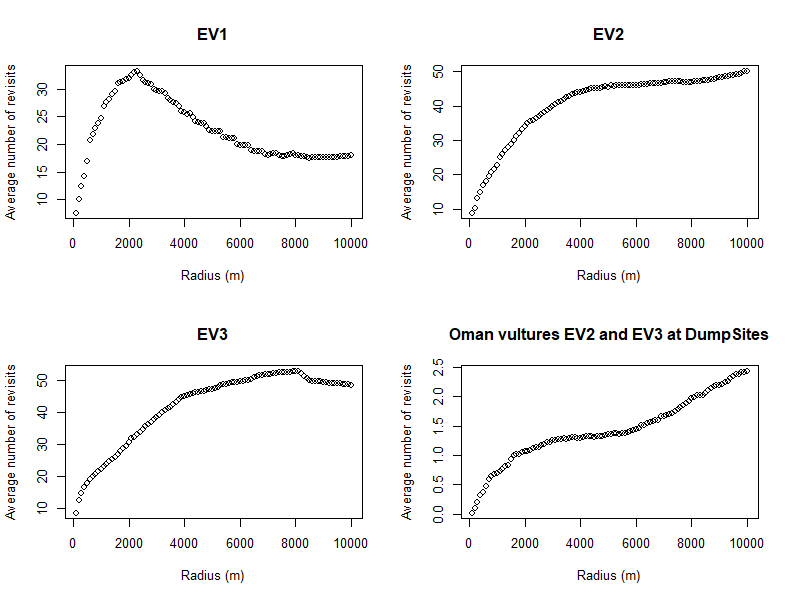


**Figure S2.** Hourly locations and 95%, 75%, and 50% KDE home ranges of a non-breeding Egyptian Vulture (EV3) tracked in Oman during 21 January 2016 – 4 October 2017. The bandwidth was based on its average hourly step-length, 4565 m.


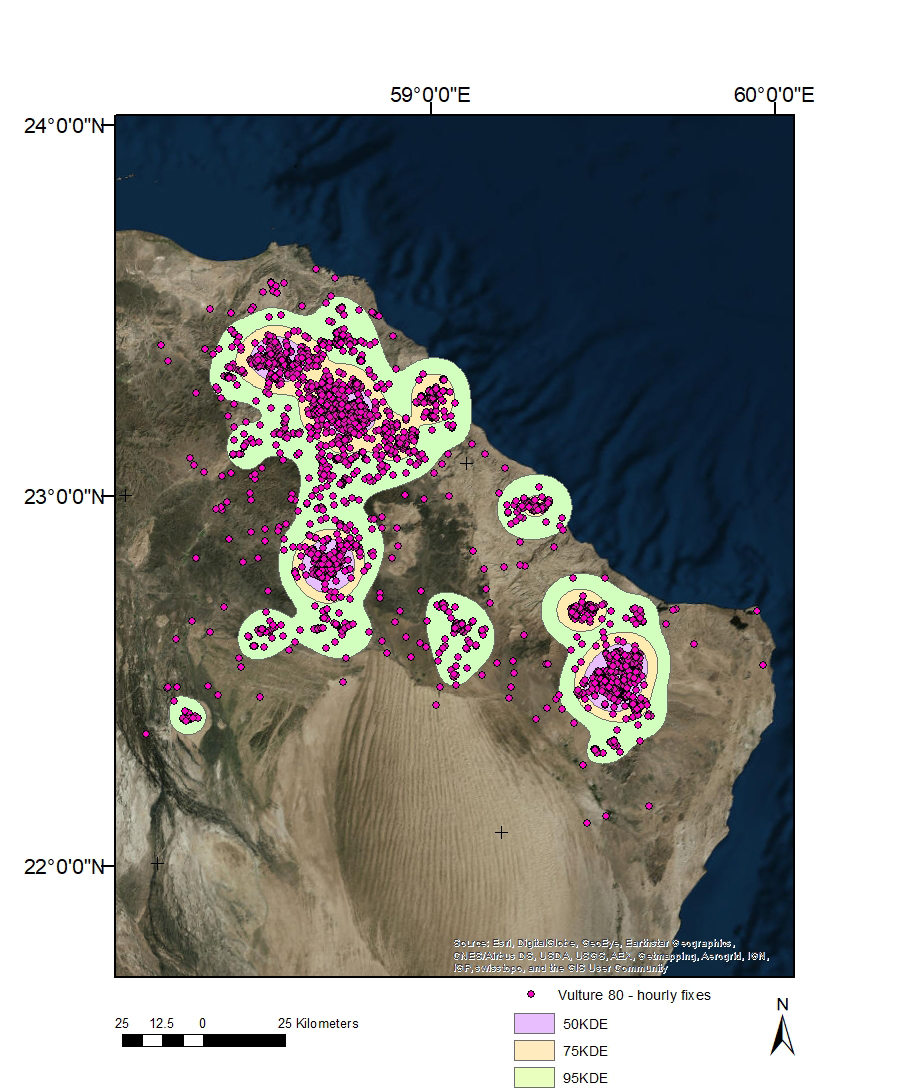

Supplement: Supplementary file 1 [file 14135129]
